# Supplementary material for: Concise synthesis of polyselenides: efficient catalysts for the oxidative cracking reaction of alkenes allowing the utilization of O2 as a partial oxidant under mild conditions
Source: Royal Society of Chemistry journal article supplement (doi:10.1039/c9se00850k), 2019-11-13

ESI for

## **Concise synthesis of polyselenide: An efficient catalyst for oxidative cracking reaction of alkenes allowing the utilization of O<sub>2</sub> as partial oxidant under mild conditions**

Liang Yu,<sup>a</sup> Hongen Cao,<sup>abc</sup> Xu Zhang,<sup>\*a</sup> Yang Chen<sup>b</sup> and Lei Yu<sup>\*a</sup>

<sup>a</sup> School of Chemistry and Chemical Engineering, Yangzhou University, Yangzhou, Jiangsu 225002, China. E-mail: zhangxu@yzu.edu.cn (X. Zhang), yulei@yzu.edu.cn (L. Yu)

<sup>b</sup> State Key Laboratory Breeding Base of Green Pesticide and Agricultural Bioengineering, Key Laboratory of Green Pesticide and Agricultural Bioengineering, Ministry of Education, Research and Development Center for Fine Chemicals, Guizhou University, Guiyang, Guizhou 550025, China

<sup>c</sup> School of Horticulture and Plant Protection, Yangzhou University, Yangzhou, Jiangsu 225009, China

### **Table of Contents**

|                                                        |    |
|--------------------------------------------------------|----|
| TOF-MS spectrum of the material ( <b>2i</b> ).....     | S2 |
| IR spectra of <b>2i</b> before and after reaction..... | S3 |
| Recycle and reuse of the catalyst.....                 | S3 |
| Characterization of the Products .....                 | S4 |
| <sup>1</sup> H NMR Spectra of the Products .....       | S7 |

# TOF-MS spectrum of the material (2i)

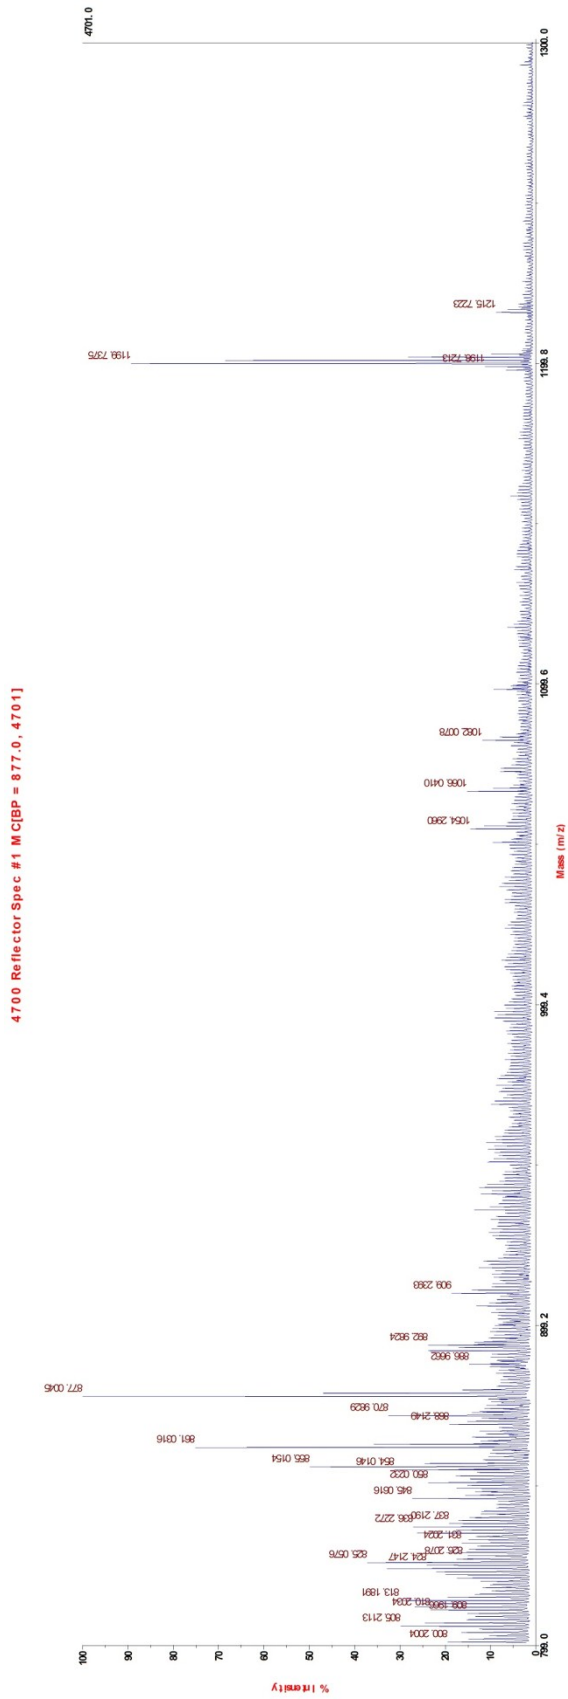

## IR spectra of 2i before and after reaction

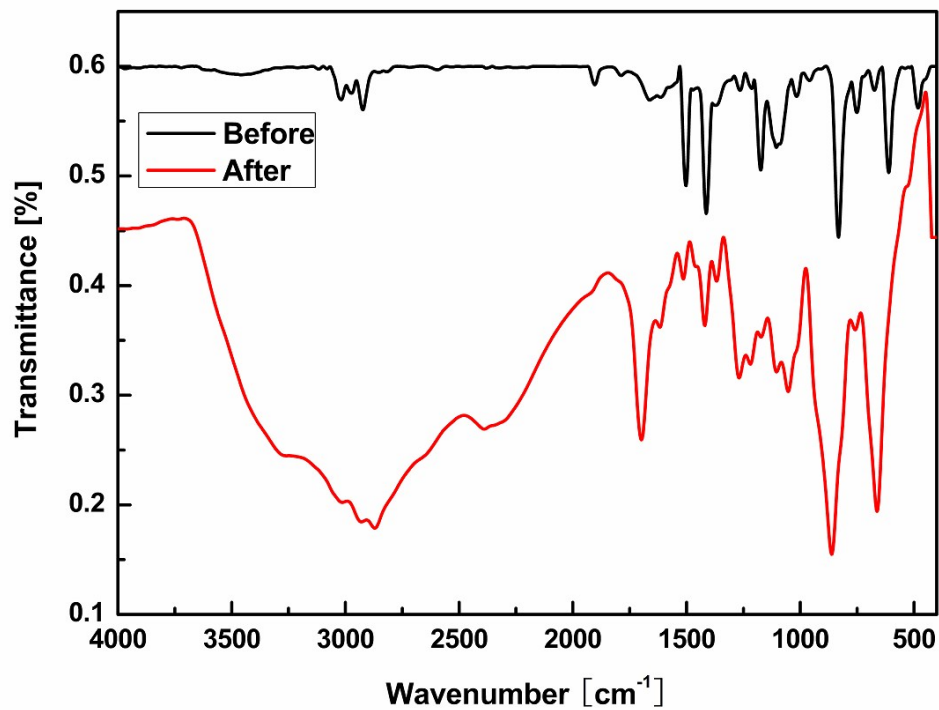

## Recycle and reuse of the catalyst

**Table S1** Recycle and reuse of the catalyst<sup>a</sup>

| Entry | Cycle NO. | C <sup>b</sup> | S <sup>b</sup> | Y <sup>b</sup> |
|-------|-----------|----------------|----------------|----------------|
| 1     | 1         | 75             | 100            | 75             |
| 2     | 2         | 76             | 96             | 73             |
| 3     | 3         | 76             | 98             | 74             |
| 4     | 4         | 75             | 97             | 73             |
| 5     | 5         | 76             | 97             | 74             |
| 6     | 6         | 74             | 96             | 71             |

<sup>a</sup> 1 mmol of **3a**, 1.5 mmol of H<sub>2</sub>O<sub>2</sub> (30 w/w%), 50 mg of polyselenide **2i** and 2 mL of EtOH were used. <sup>b</sup> Abbreviations: C = Conversion ratio of **3a**/%; S = Selectivity of **4a**/%; Y = Isolated yield of **4a**/%.

## Characterization of the Products

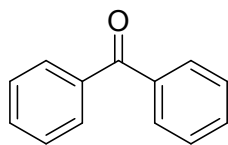

**Diphenyl-methanone (4a):** Solid; m. p. 47.1-48.6 °C (*lit.* 47-51 °C); IR (KBr): 1662, 1595, 1577, 1448, 1326, 1281, 1176, 1160, 1074, 999, 974, 941, 919, 809, 763, 700, 638 cm<sup>-1</sup>; <sup>1</sup>H NMR (400 MHz, CDCl<sub>3</sub>, TMS): δ 7.81-7.79 (m, 4H), 7.60-7.56 (m, 2H), 7.49-7.45 (m, 4H); Known compound.<sup>1</sup>

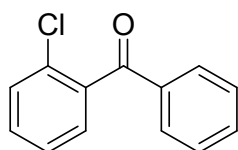

**(2-Chlorophenyl)phenyl-methanone (4b):** Solid; m. p. 44.2-47.4 °C (*lit.* 44-47 °C); IR (KBr): 1664, 1597, 1580, 1451, 1320, 1297, 1253, 1154, 1056, 936, 927, 802, 766, 744, 693, 636 cm<sup>-1</sup>; <sup>1</sup>H NMR (400 MHz, CDCl<sub>3</sub>, TMS, ppm): δ 7.81 (d, *J* = 7.9 Hz, 2H), 7.61-7.58 (m, 1H), 7.48-7.36 (m, 6H); Known compound.<sup>2</sup>

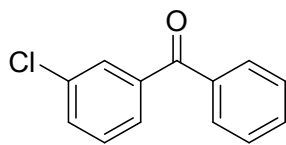

**(3-Chlorophenyl)(phenyl)methanone (4c):** Solid; m. p. 85.3-87.2 °C (*lit.* 85-87 °C); IR (KBr): 1653, 1568, 1423, 1314, 1279, 1076, 961, 897, 765, 718, 697, 682 cm<sup>-1</sup>; <sup>1</sup>H NMR (400 MHz, CDCl<sub>3</sub>, TMS, ppm): δ 7.78 (d, *J* = 8.2 Hz, 3H), 7.66 (d, *J* = 7.5 Hz, 1H), 7.63-7.59 (m, 1H), 7.56 (d, *J* = 8.0 Hz, 1H), 7.51-7.47 (m, 2H), 7.44-7.40 (m, 1H); Known compound.<sup>2</sup>

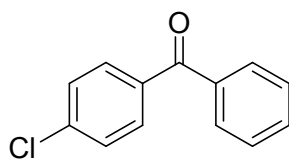

**4-Chlorobenzophenone (4d):** Solid; m. p. 93.6-95.4 °C (*lit.* 93-96 °C); IR (KBr): 1662, 1597, 1586, 1483, 1319, 1301, 1286, 1147, 1091, 976, 940, 846, 729, 696, 665, 476 cm<sup>-1</sup>; <sup>1</sup>H NMR (400 MHz, CDCl<sub>3</sub>, TMS, ppm): δ 7.78-7.73 (m, 4H), 7.62-7.57 (m, 1H), 7.50-7.44 (m, 4H); Known compound.<sup>2</sup>

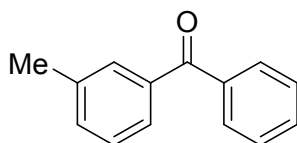

**3-Methylbenzophenone (4f):** Oil; IR (KBr): 1661, 1603, 1598, 1443, 1319, 1311, 1282, 1212, 1176, 964, 957, 779, 725, 706, 696, 643 cm<sup>-1</sup>; <sup>1</sup>H NMR (400 MHz, CDCl<sub>3</sub>,

TMS, ppm):  $\delta$  7.81-7.78 (m, 2H), 7.63-7.61 (m, 1H), 7.58 -7.54 (m, 2H), 7.48 -7.43 (m, 2H), 7.39-7.32 (m, 2H), 2.40 (s, 3H); Known compound.<sup>2</sup>

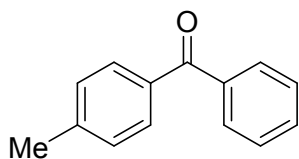

**4-Methylbenzophenone (4g):** Solid; m. p. 56.3-56.8 °C (*lit.* 56.5-57 °C); IR (KBr): 2963, 2925, 2856, 1655, 1606, 1461, 1447, 1317, 1304, 1281, 1178, 936, 922, 841, 733, 699  $\text{cm}^{-1}$ ;  $^1\text{H}$  NMR (400 MHz,  $\text{CDCl}_3$ , TMS, ppm):  $\delta$  7.79-7.76 (m, 2H), 7.73-7.70 (m, 2H), 7.59-7.54 (m, 1H), 7.49-7.44 (m, 2H), 7.28-7.24 (m, 2H), 2.43 (s, 3H); Known compound.<sup>2</sup>

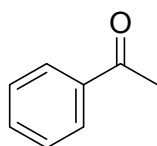

**Acetophenone (4h):** Oil; IR (film): 1685, 1597, 1449, 1383, 1303, 1245, 1176, 1094, 1050, 954, 759, 690  $\text{cm}^{-1}$ ;  $^1\text{H}$  NMR (400MHz,  $\text{CDCl}_3$ , TMS, ppm):  $\delta$  7.97 -7.94 (m, 2H), 7.58-7.53 (m, 1H), 7.48-7.43 (m, 2H), 2.60 (s, 3H); Known compound.<sup>1</sup>

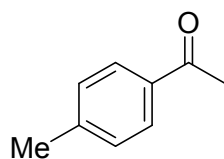

**4'-Methylacetophenone (4i):** Oil; IR (film): 1681, 1606, 1573, 1429, 1406  $\text{cm}^{-1}$ ;  $^1\text{H}$  NMR (400MHz,  $\text{CDCl}_3$ , TMS, ppm):  $\delta$  7.83 (d,  $J = 7.3$  Hz, 2H), 7.23 (d,  $J = 7.5$  Hz, 2H), 2.55 (s, 3H), 2.38 (s, 3H); Known compound.<sup>1</sup>

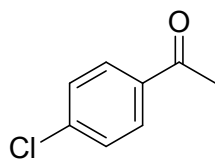

**4'-Chloroacetophenone (4j):** Oil; IR (film): 1686, 1589, 1487, 1462, 1396, 1357, 1260, 1174, 1094, 1013, 957, 821, 761, 622  $\text{cm}^{-1}$ ;  $^1\text{H}$  NMR (400MHz,  $\text{CDCl}_3$ , TMS, ppm):  $\delta$  7.89-7.86 (m, 2H), 7.43-7.40 (m, 2H), 2.57 (s, 3H); Known compound.<sup>1</sup>

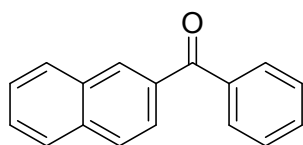

**2-Naphthyl phenyl ketone (4k):** Solid; m. p. 76.3-81.8 °C (*lit.* 76-82 °C); IR (film): 2925, 2855, 1658, 1465, 1447, 1378, 754, 717, 698, 485 cm<sup>-1</sup>; <sup>1</sup>H NMR (400MHz, CDCl<sub>3</sub>, TMS, ppm): δ 8.27 (s, 1H), 7.95-7.85 (m, 6H), 7.65-7.50 (m, 5H); Known compound.<sup>2</sup>

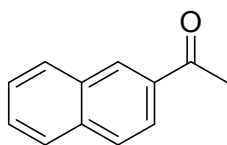

**2-Acetonaphthone (4l):** Solid; m. p. 52.3-56.6 °C (*lit.* 52-56 °C); IR (film): 1677, 1625, 1468, 1433, 1366, 1282, 1270, 1194, 1128, 870, 834, 823, 756, 486 cm<sup>-1</sup>; <sup>1</sup>H NMR (400MHz, CDCl<sub>3</sub>, TMS, ppm): δ 8.46 (s, 1H), 8.03 (dd, *J* = 8.6, 1.8 Hz, 1H), 7.96 (d, *J* = 8.0 Hz, 1H), 7.90-7.86 (m, 2H), 7.62-7.53 (m, 2H), 2.72 (s, 3H); Known compound.<sup>2</sup>

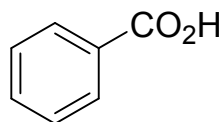

**Benzoic acid (5a):** Solid; m. p. 121.3-122.6 °C (*lit.* 122.13 °C); IR (KBr): 1689, 1464, 1426, 1327, 1294, 943, 936, 708 cm<sup>-1</sup>; <sup>1</sup>H NMR (400MHz, CDCl<sub>3</sub>, TMS): δ 8.14 – 8.12 (m, 2H), 7.65 – 7.60 (m, 1H), 7.51 – 7.47 (m, 2H) ; Known compound.<sup>2</sup>

## References

1. T.-T. Wang, X.-B. Jing, C. Chen and L. Yu, *J. Org. Chem.*, 2017, **82**, 9342
2. Spectral Database for Organic Compounds, SDBS.  
[http://sdbs.db.aist.go.jp/sdbs/cgi-bin/direct\\_frame\\_top.cgi](http://sdbs.db.aist.go.jp/sdbs/cgi-bin/direct_frame_top.cgi).

# <sup>1</sup>H NMR Spectra of the Products

**4a**, <sup>1</sup>H NMR, CDCl<sub>3</sub>, 400 MHz

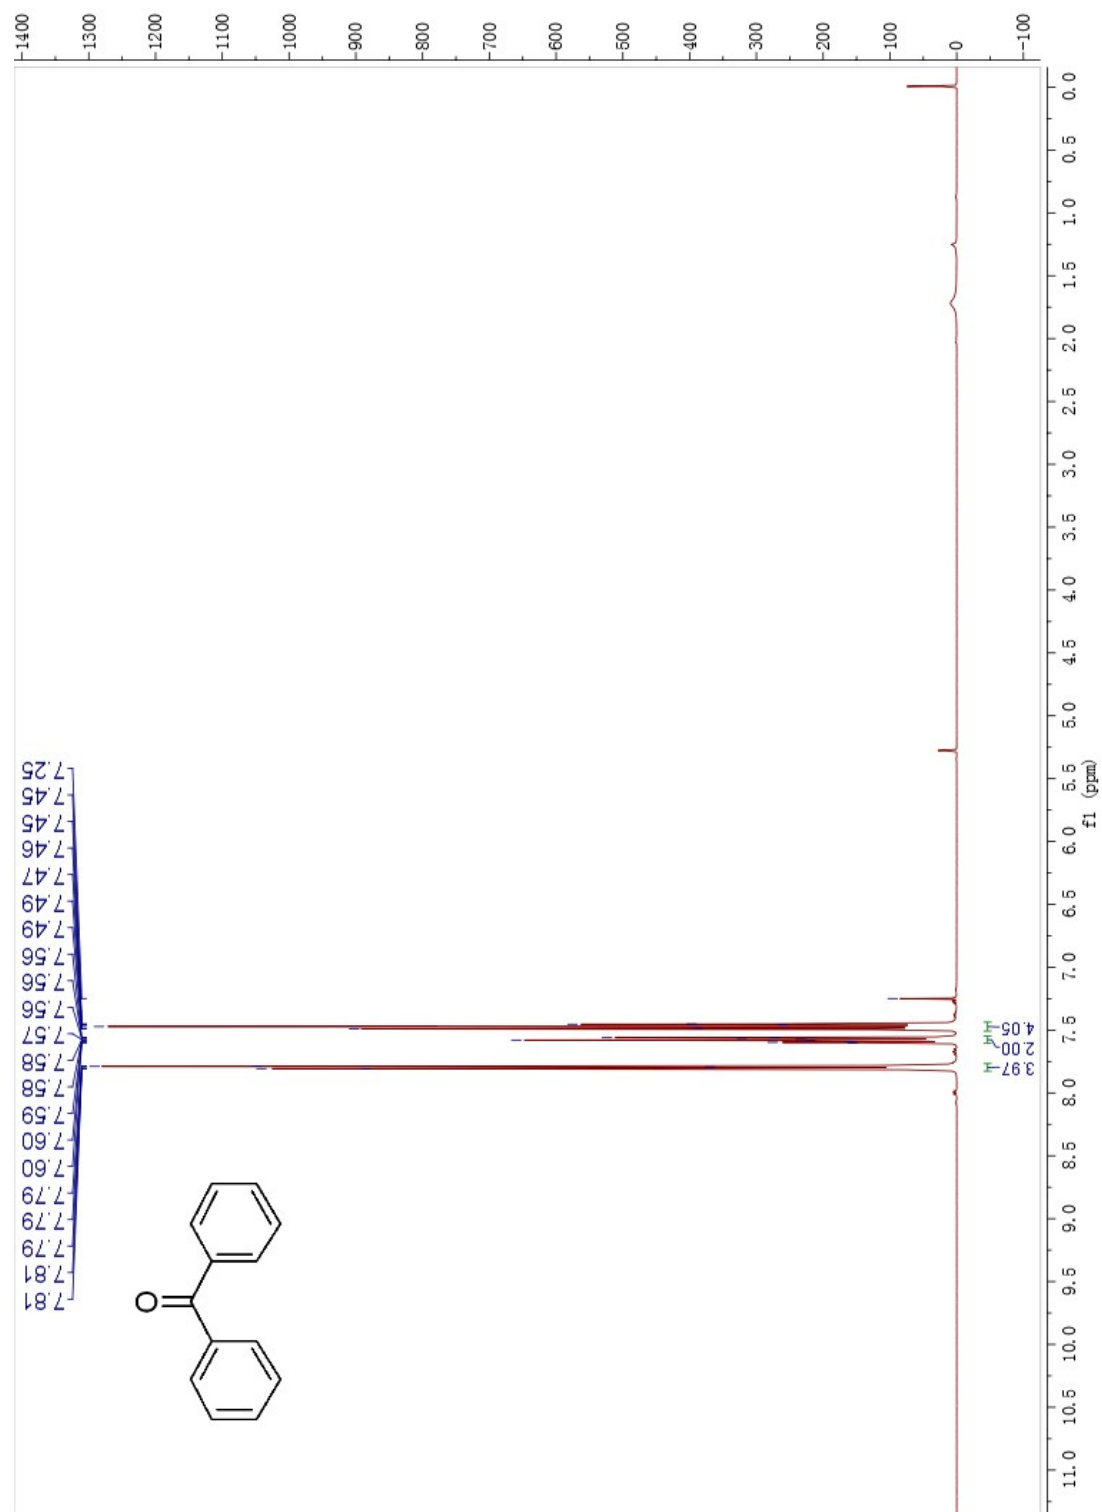

**4b**,  $^1\text{H}$  NMR,  $\text{CDCl}_3$ , 400 MHz

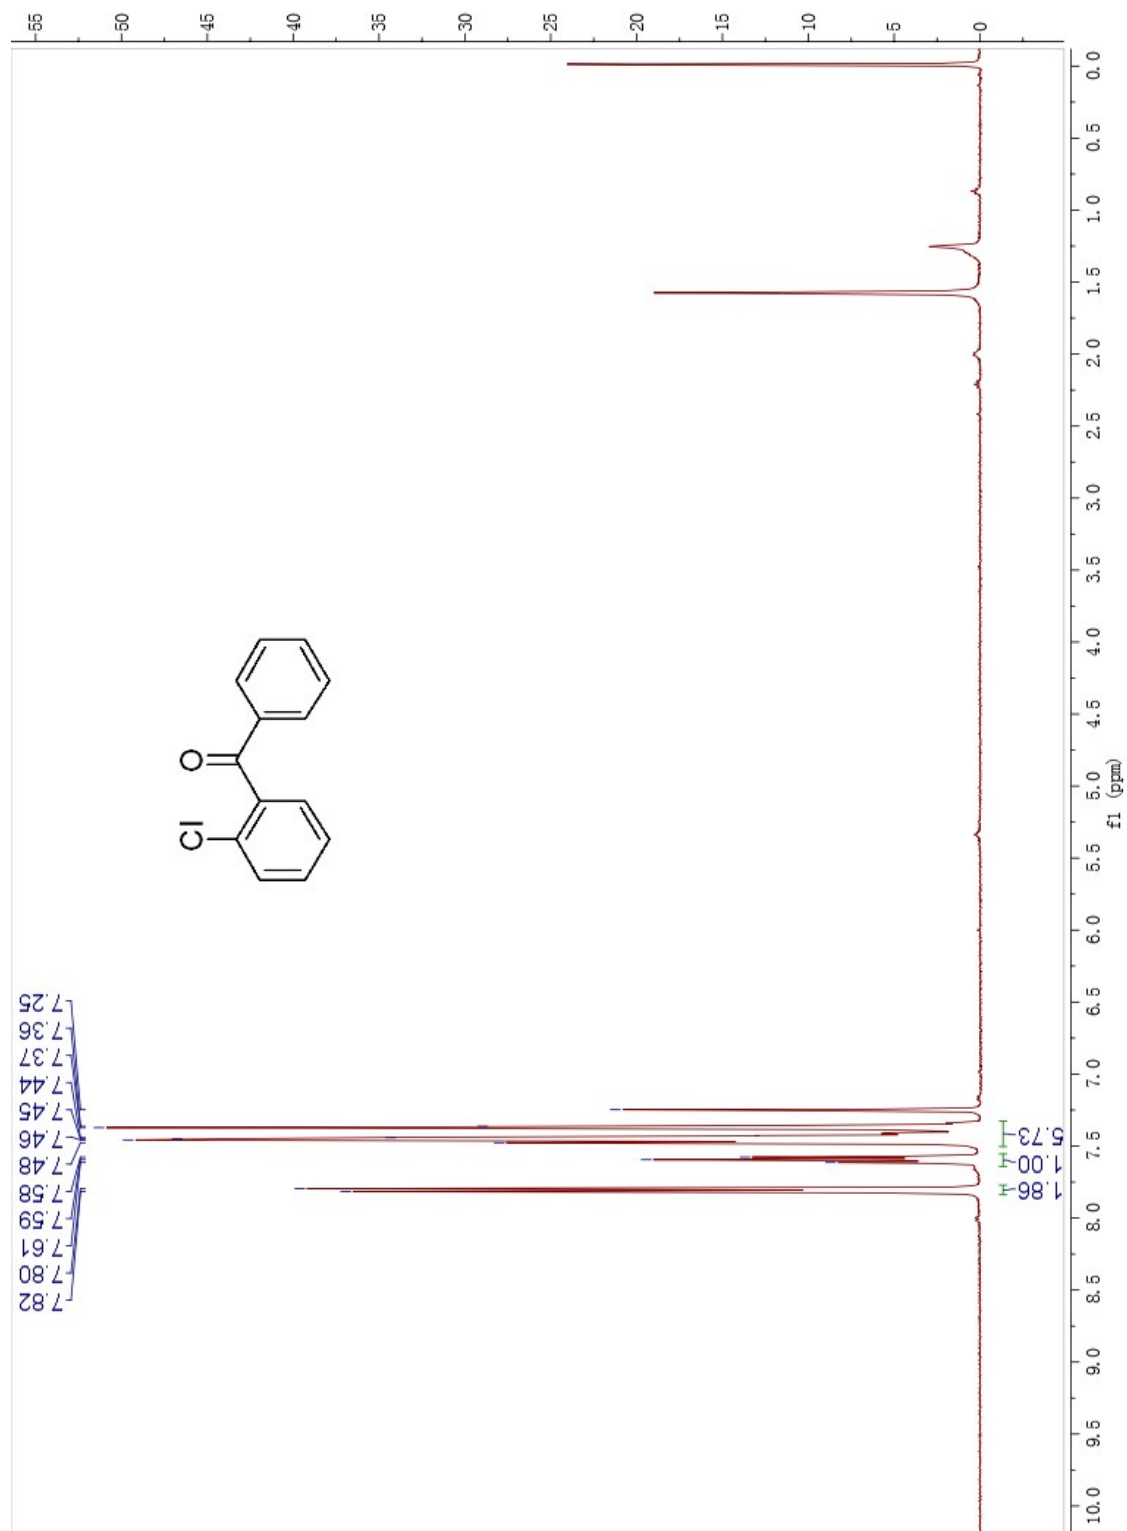



4c,  $^1\text{H}$  NMR,  $\text{CDCl}_3$ , 400 MHz

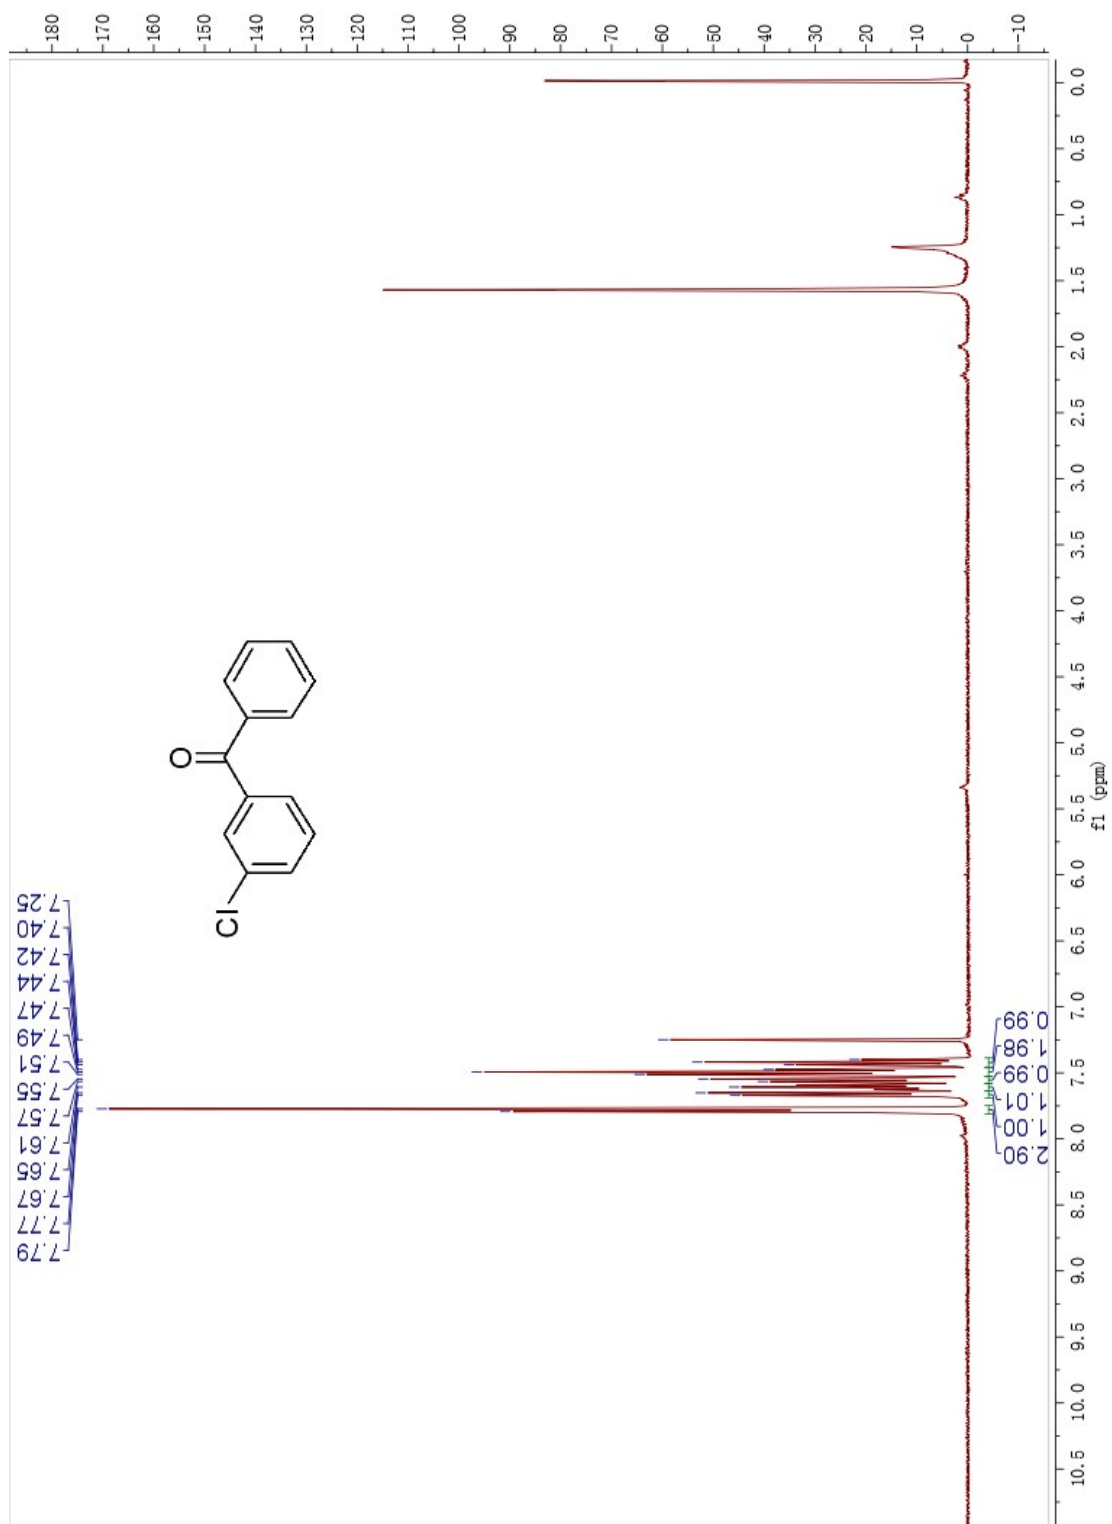

4d, <sup>1</sup>H NMR, CDCl<sub>3</sub>, 400 MHz

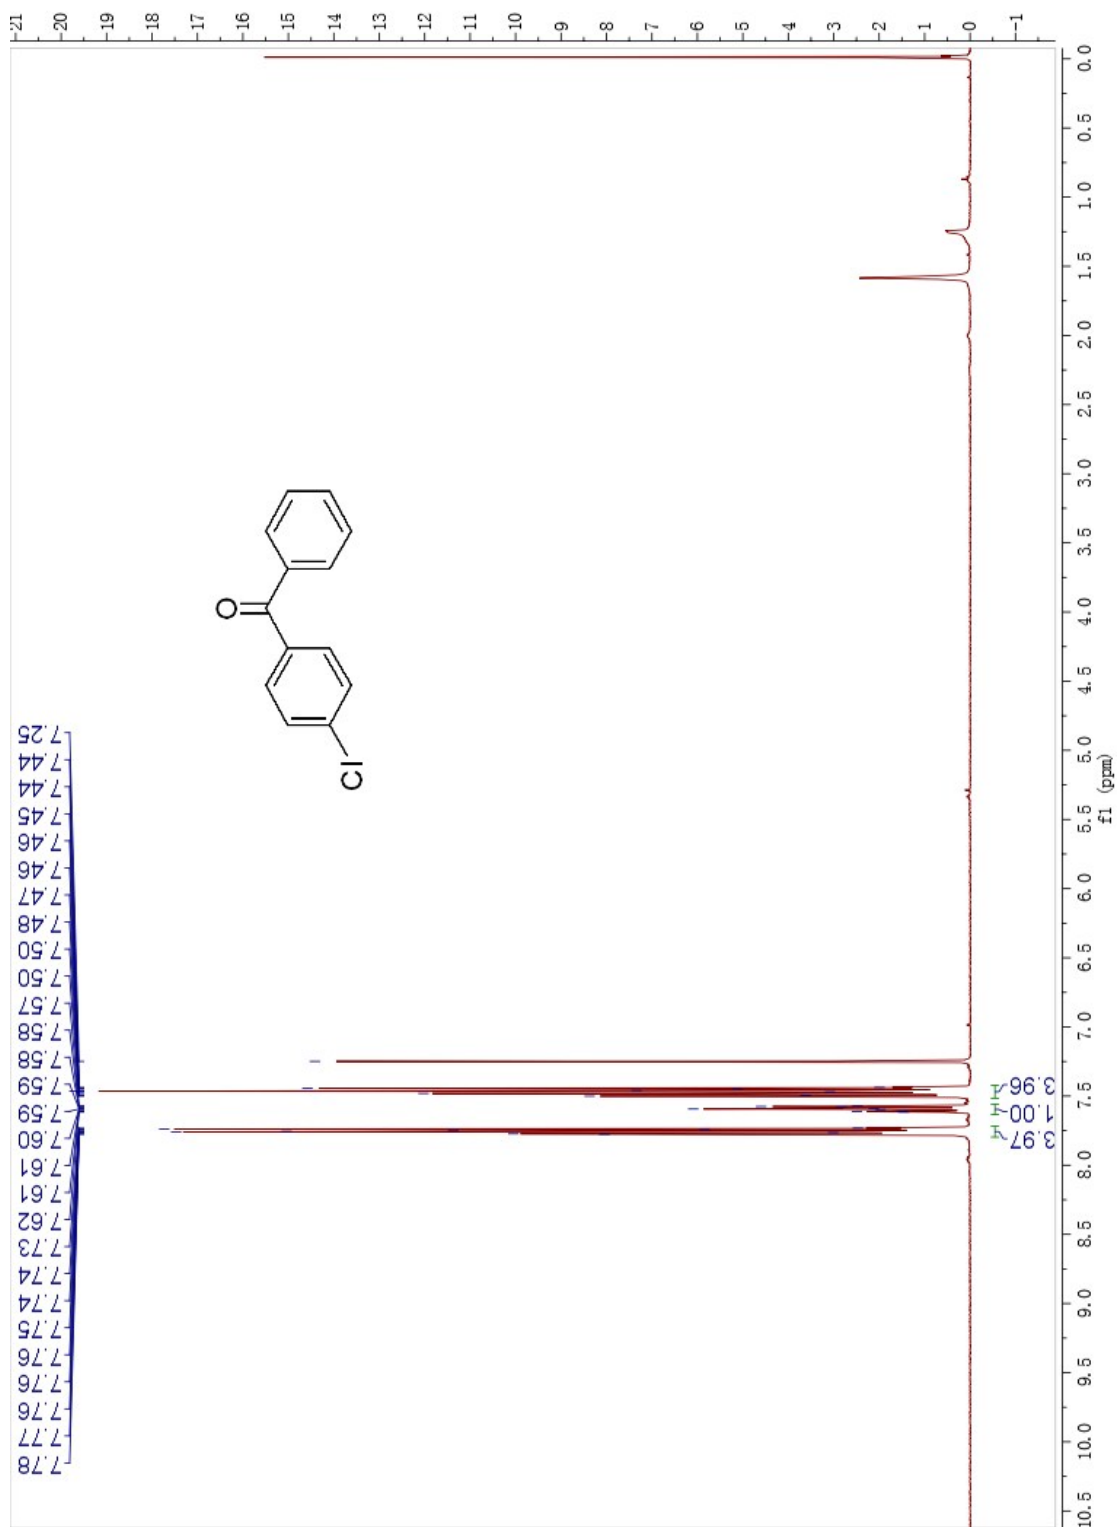

4f, <sup>1</sup>H NMR, CDCl<sub>3</sub>, 400 MHz

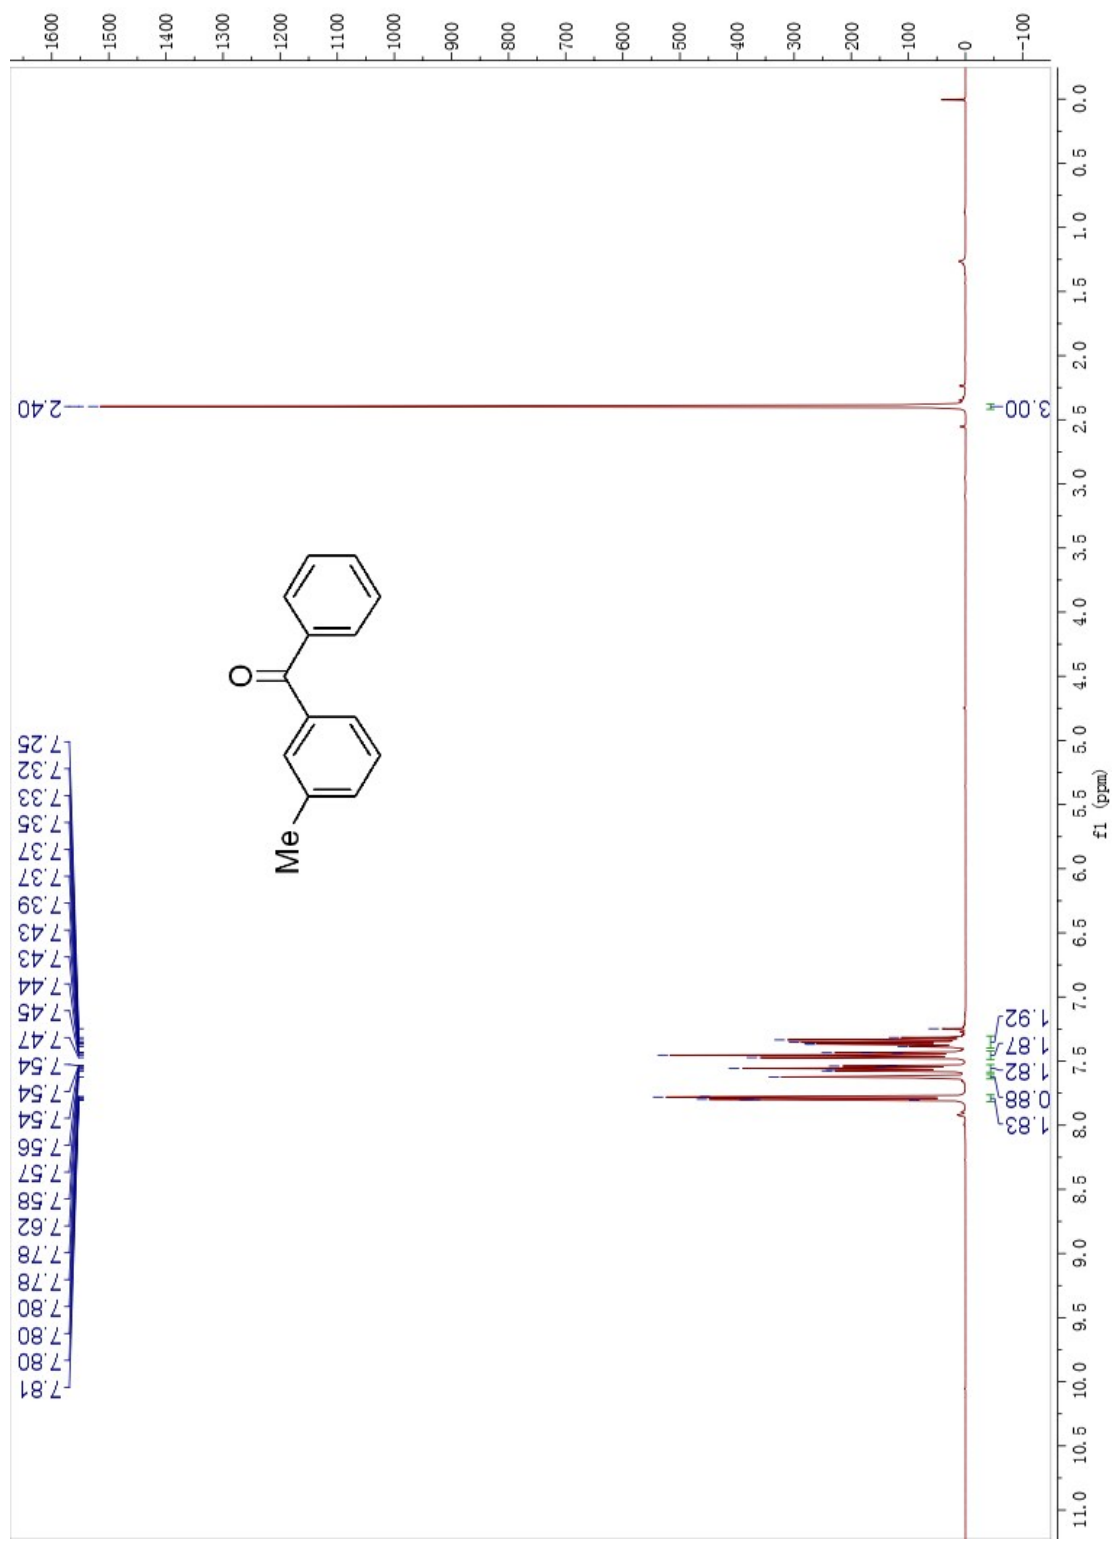

4g,  $^1\text{H}$  NMR,  $\text{CDCl}_3$ , 400 MHz

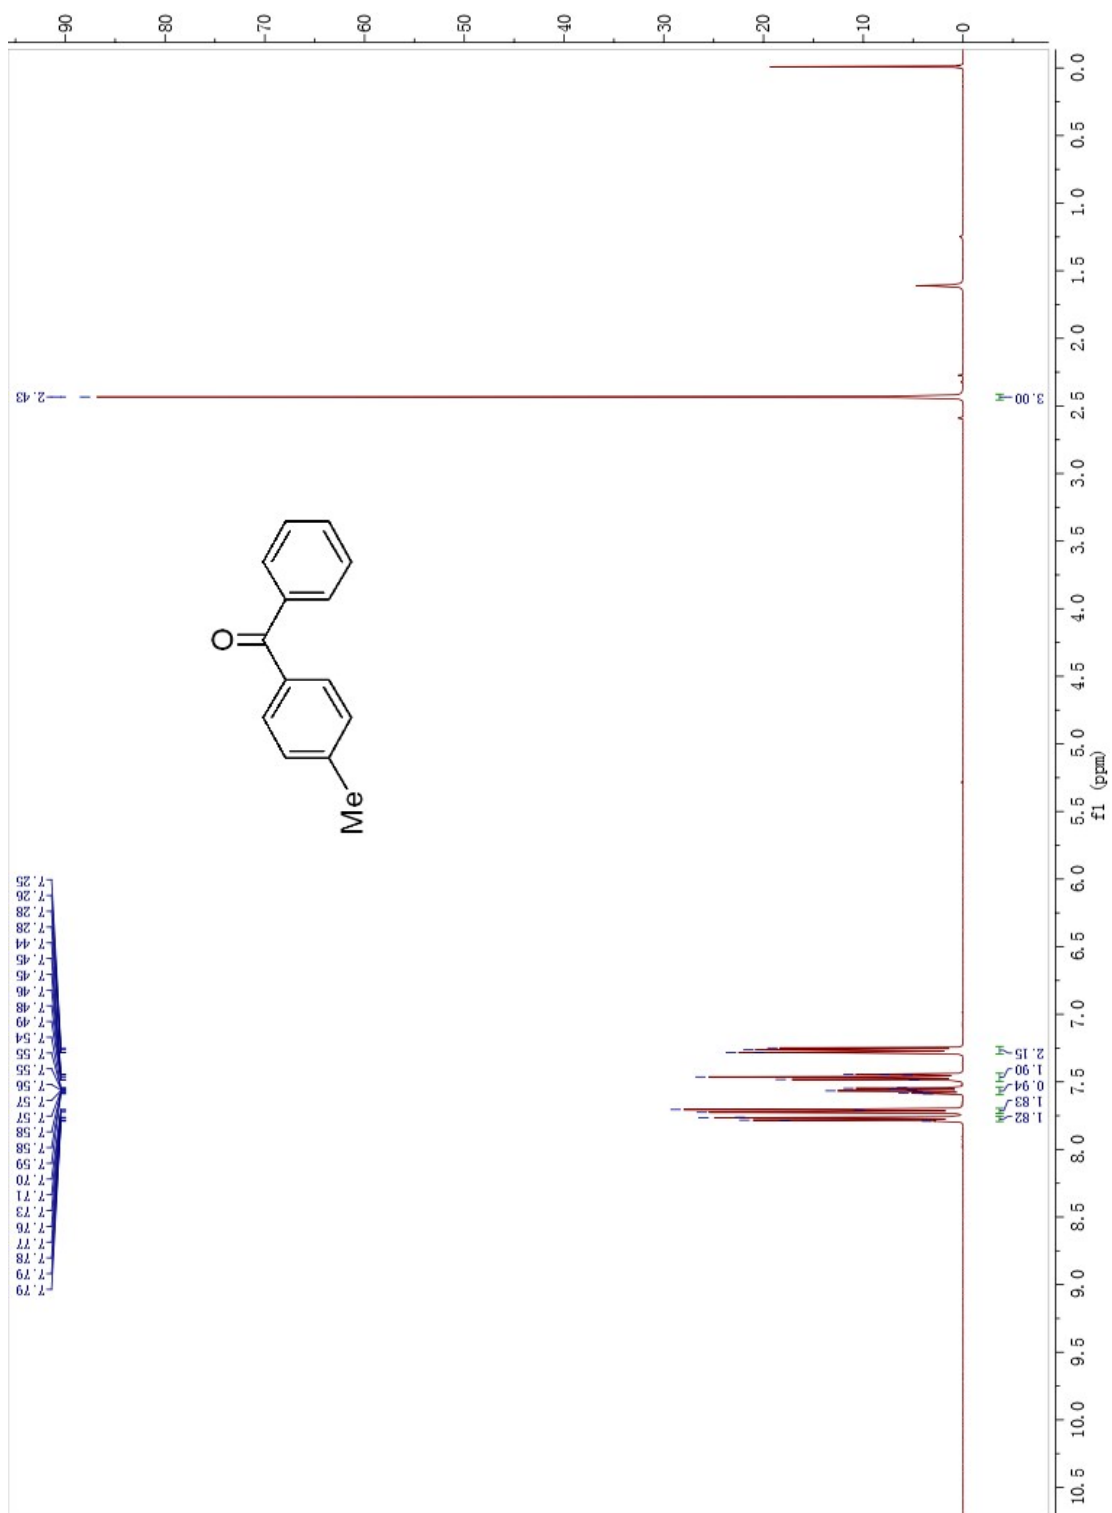

**4h**,  $^1\text{H}$  NMR,  $\text{CDCl}_3$ , 400 MHz

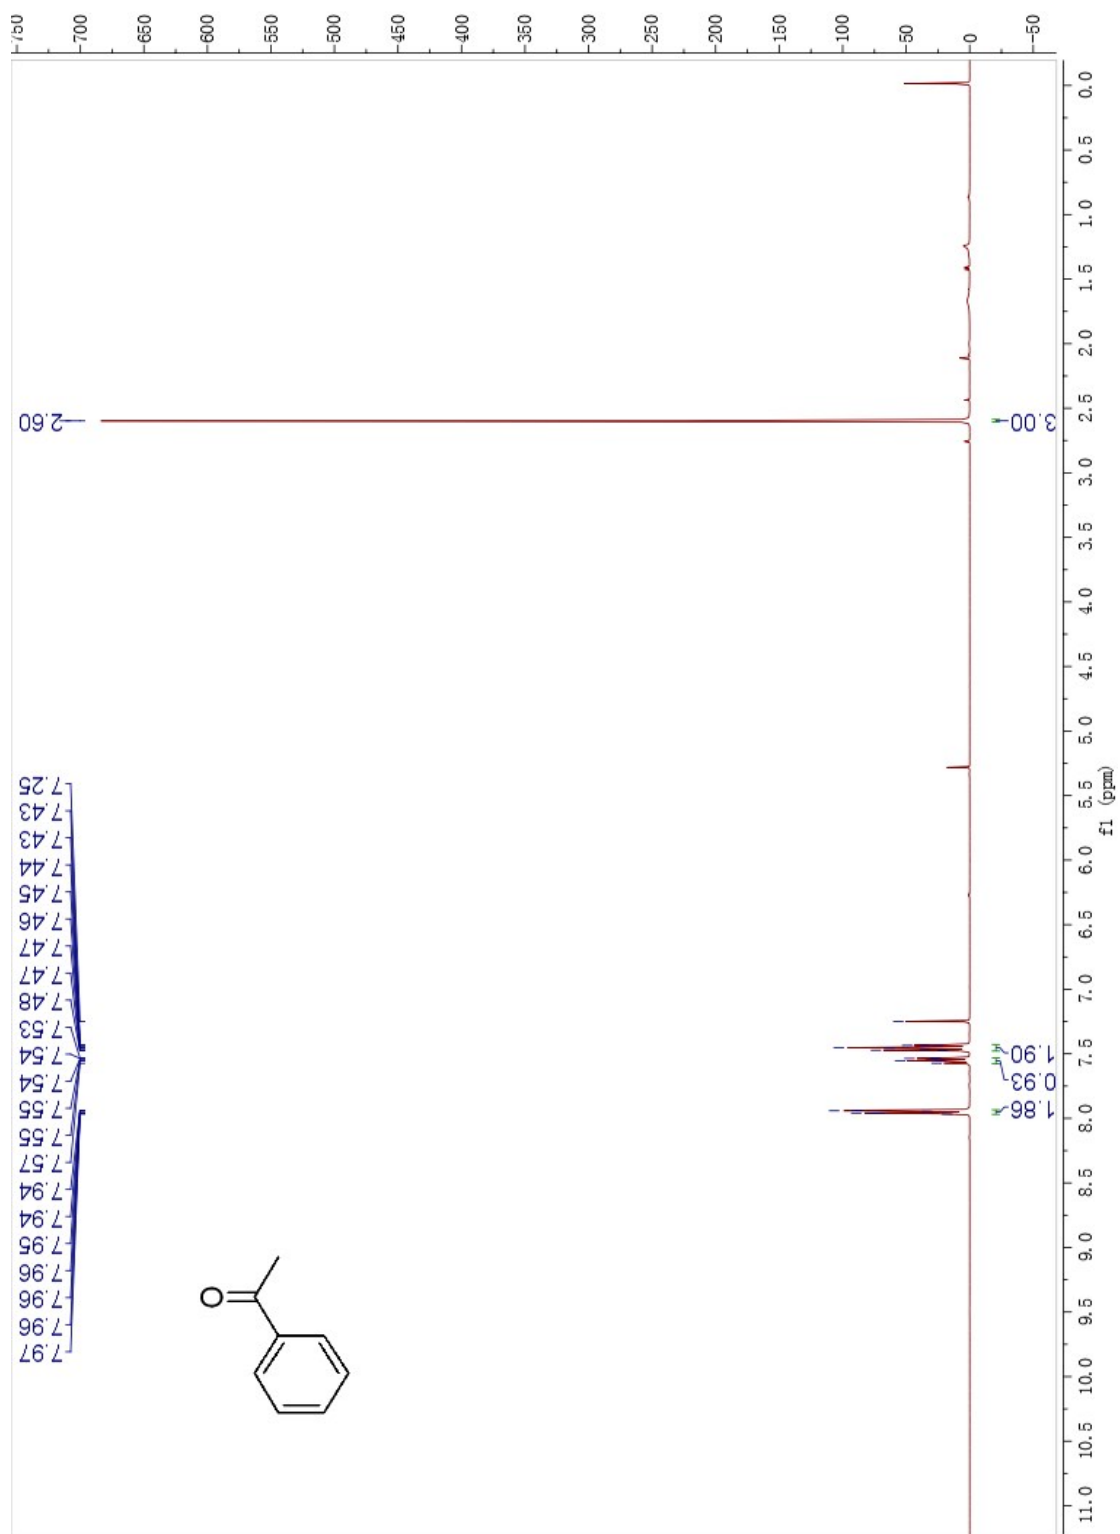

4i,  $^1\text{H}$  NMR,  $\text{CDCl}_3$ , 400 MHz

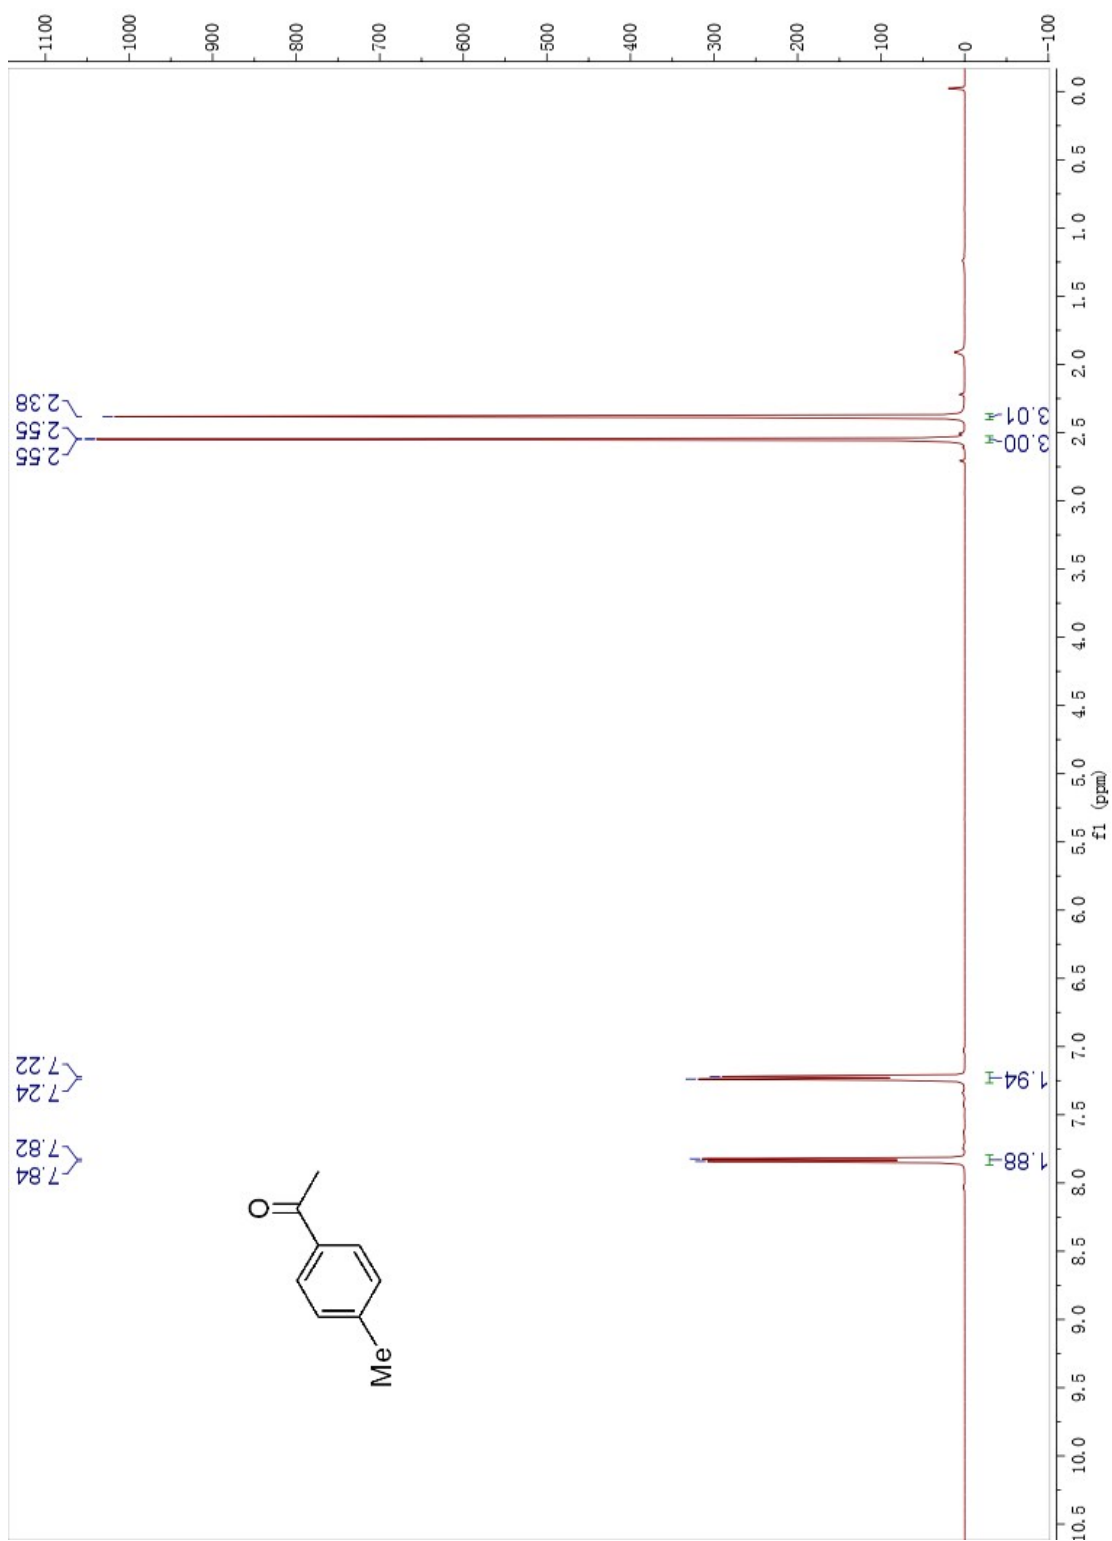

4j,  $^1\text{H}$  NMR,  $\text{CDCl}_3$ , 400 MHz

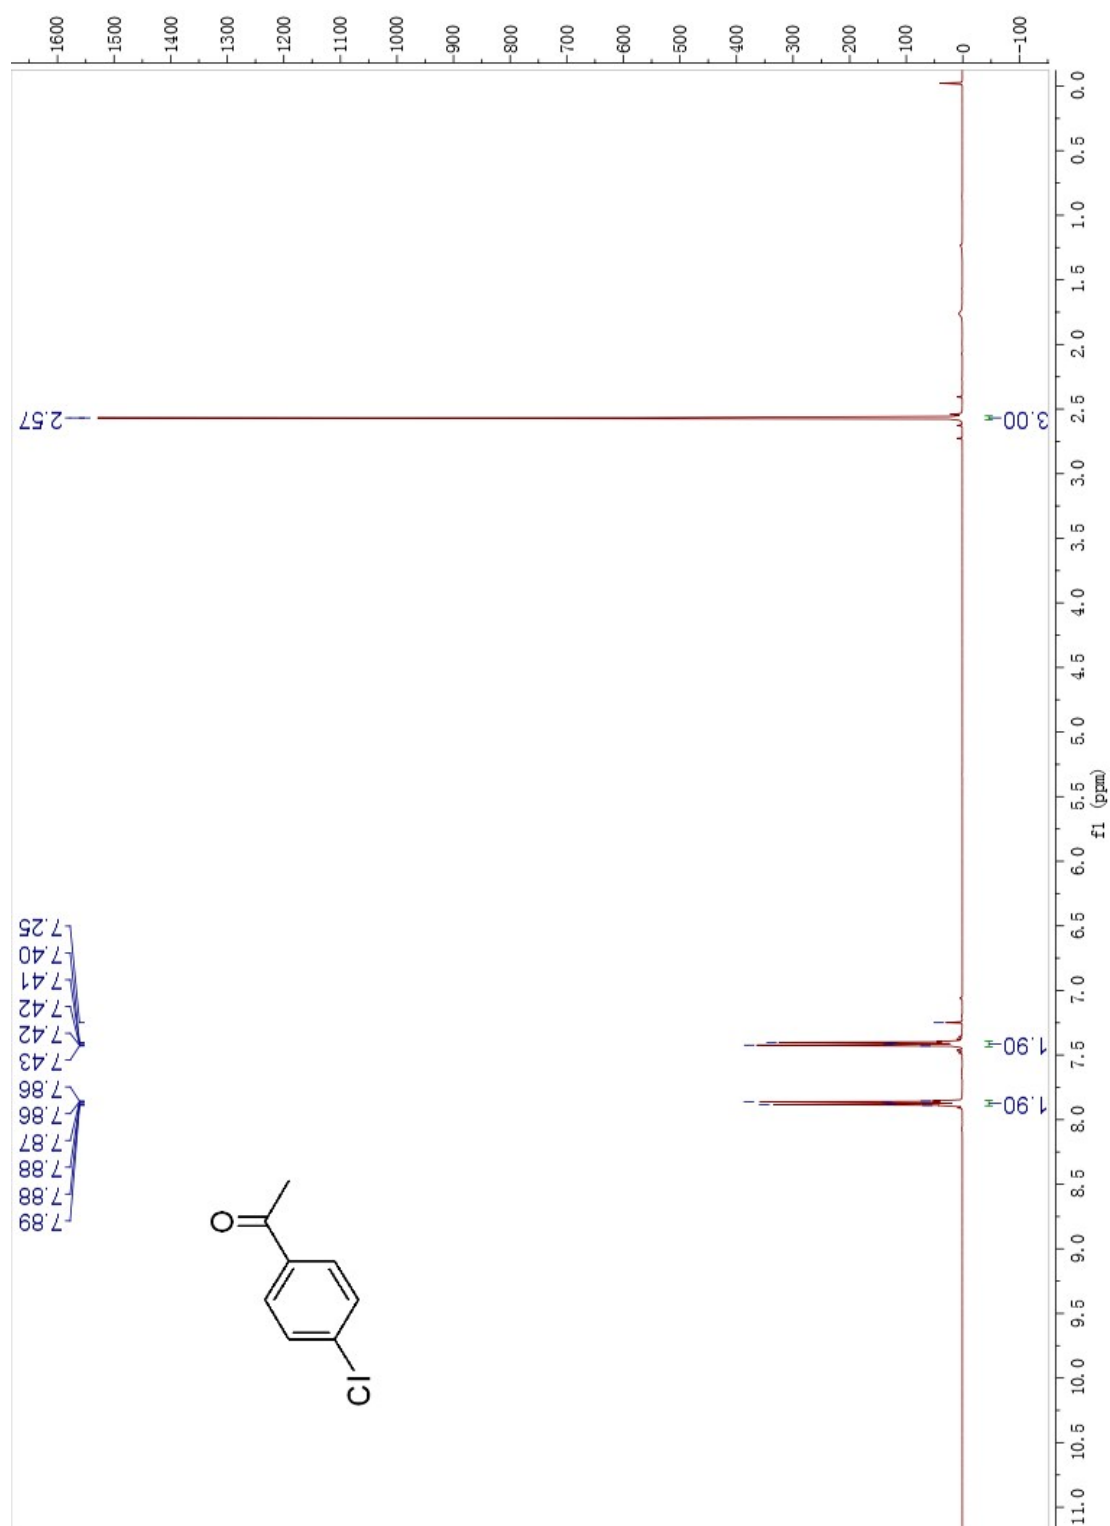

4k,  $^1\text{H}$  NMR,  $\text{CDCl}_3$ , 400 MHz

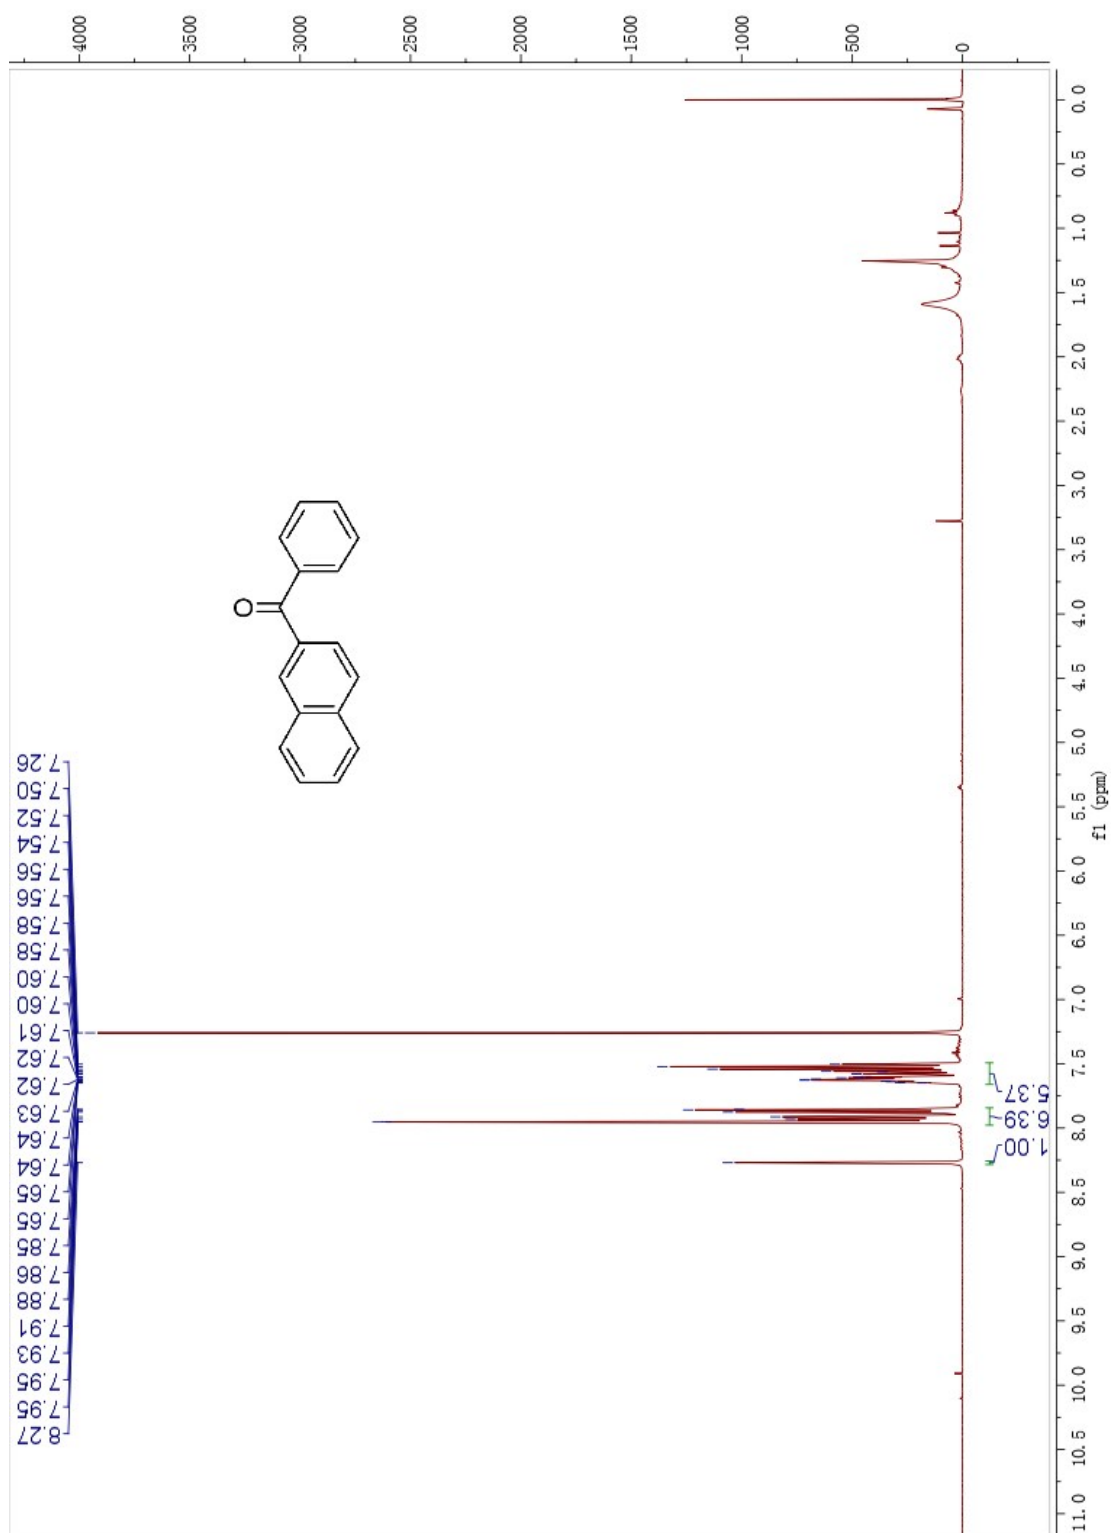



4l,  $^1\text{H}$  NMR,  $\text{CDCl}_3$ , 400 MHz

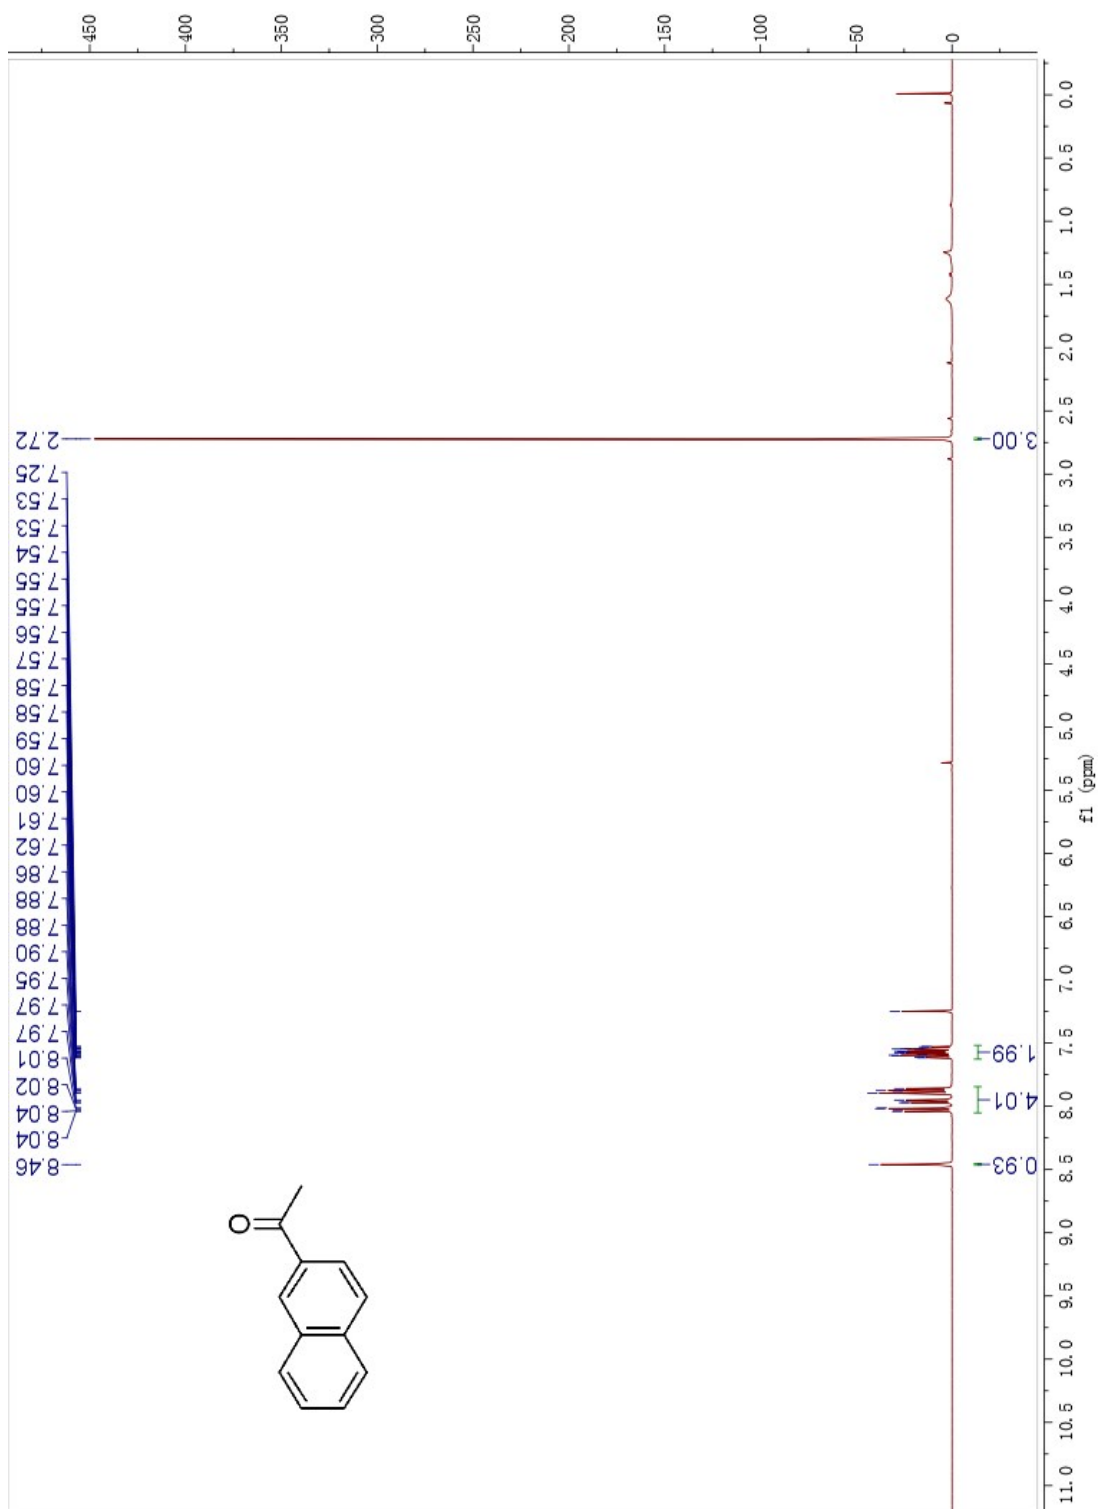

5a, <sup>1</sup>H NMR, CDCl<sub>3</sub>, 400 MHz

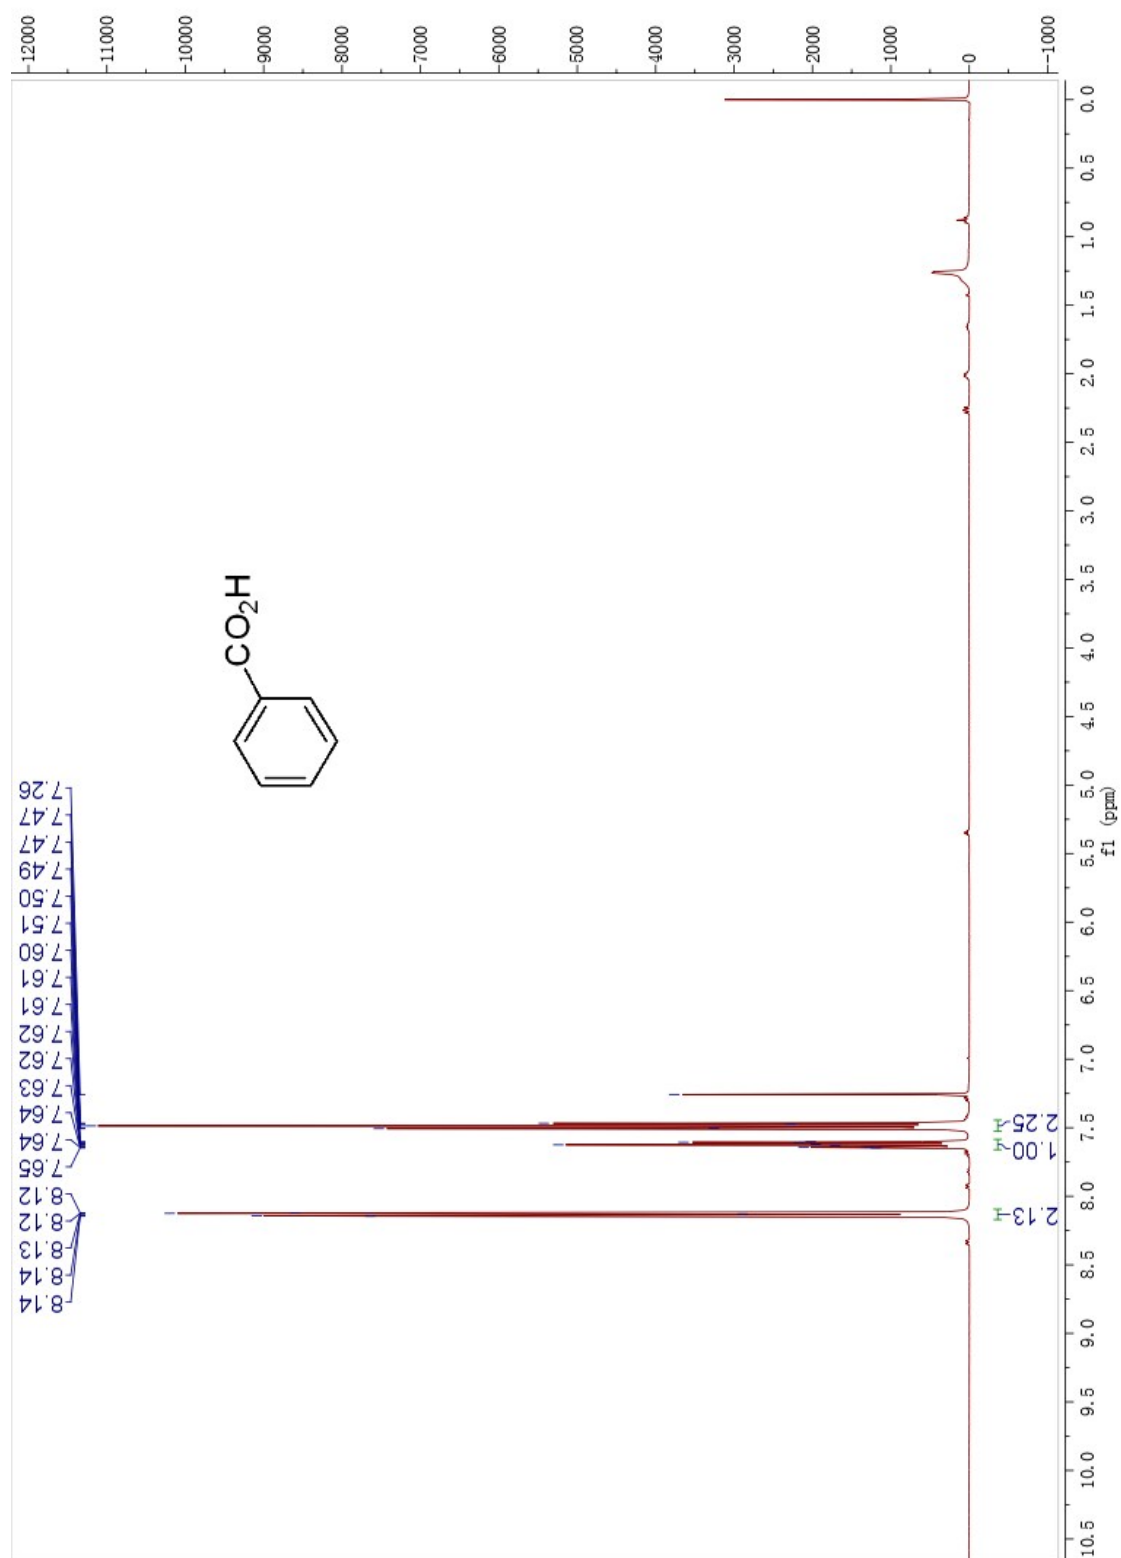

Supplement: c9se00850k1.pdf [file c9se00850k1.pdf]
